# Supplementary material for: ChatGPT in Iranian medical licensing examination: evaluating the diagnostic accuracy and decision-making capabilities of an AI-based model
Source: PubMed Central journal article supplement — BMJ Health Care Inform. 2023 Dec 11;30(1):e100815. doi: 10.1136/bmjhci-2023-100815 (PMC10729145; doi:10.1136/bmjhci-2023-100815), 2023-12-11
Supplement: bmjhci-2023-100815supp001.pdf [file bmjhci-2023-100815supp001.pdf]

The java class named “MassMCQExaminees”: this class uses three input variables namely, *numberOfChoices*, *numberOfTests* and *numberOfExaminees*. As you can see this class creates multiple instances of OneCourse class.

```
public class MassMCQExaminees {
    public static void main (String[] args) {
        int numberOfTests = 200;
        int numberOfChoices = 4;
        final int numberOfExaminees = 5000;
        //Doing Course for multiple participants
        float cummulativePercentage = 0;
        for (int participants = 1; participants<=numberOfExaminees;
participants++) {
            OneCourse newCourse = new OneCourse();
            float result = newCourse.resultPercent(numberOfTests,
numberOfChoices);
            cummulativePercentage = cummulativePercentage + result;
        }
        cummulativePercentage = cummulativePercentage/numberOfExaminees;
        System.out.println(cummulativePercentage);
    }
}
```

Also, the OneCourse Class that returns the results as percentage for each random examinees is shown below:

```
public class OneCourse {

    public static float resultPercent(int totalTests, int numberOfChoices) {
        int totalCorrects = 0;
        for (int i = 1; i <= totalTests; i++) {
            //int result=3;
            double randomChoice = Math.random() * (numberOfChoices) + 1;
            int choiceInteger = (int) randomChoice;
            //making a random answer :)
            double randomAnswer = Math.random() * (numberOfChoices) + 1;
            int answerInteger = (int) randomAnswer;
            int result = answerInteger;
            //end
            if (choiceInteger == result) totalCorrects++;
        }
        return (100 * totalCorrects / totalTests);
    }
}
```

The average results for 5000 examinees has been shown below:  
24.8004
